# Supplementary material
Source: PubMed Central journal article supplement (PMC7657232)
Supplement: CAS-104-889-s001.pdf [file CAS-104-889-s001.pdf]

The addition of chaetocin immediately affects on the cell migration suggesting that the impaired cell motility was not a result of transcriptional regulations.

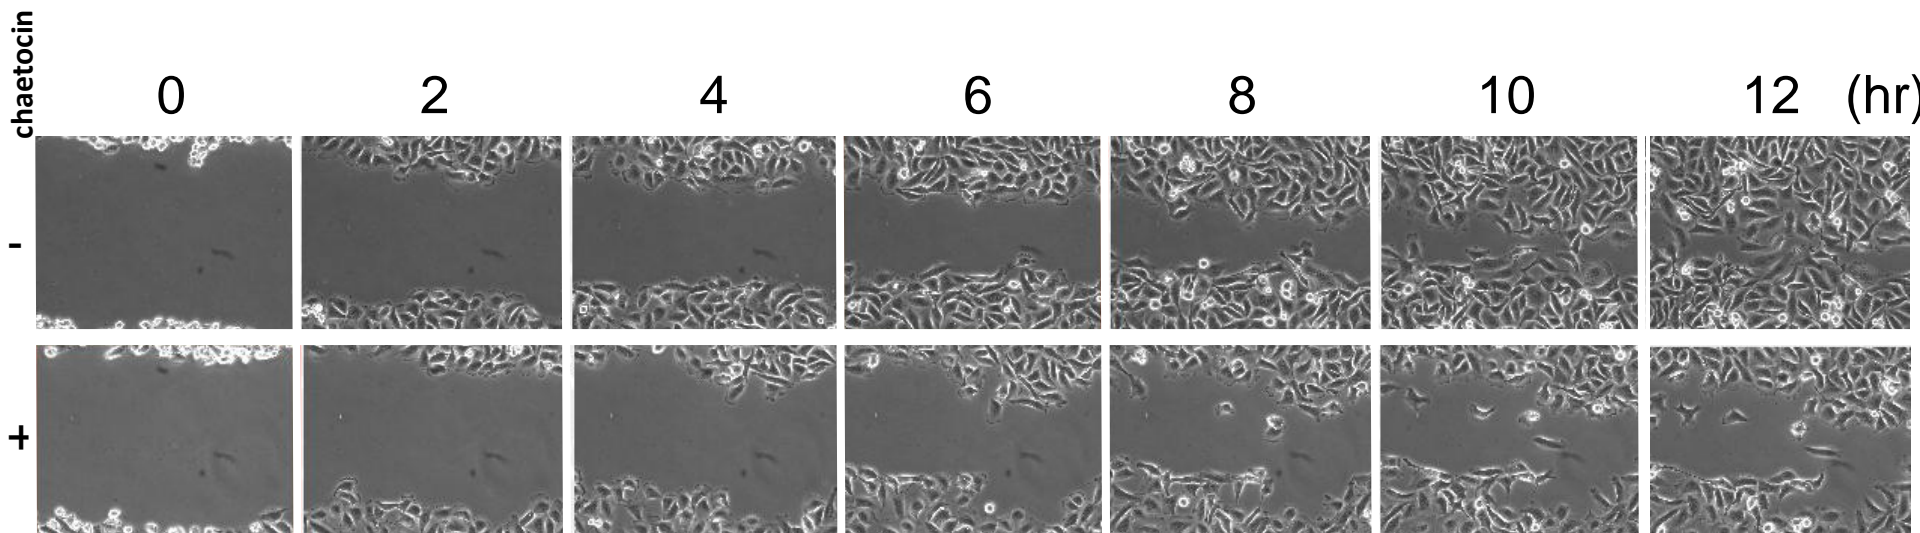

↑  
Add 200 nM chaetocin

Confluent cells were scratched and incubated. After two hours, chaetocin was added to the cells (lower). Phase-contrast images taken every 2 hours are shown.
