# Supplementary material
Source: PubMed Central journal article supplement (PMC7657232)
Supplement: CAS-104-889-s003.pdf [file CAS-104-889-s003.pdf]

Figure S3 Yokoyama et al.,  
H3K9 di-methylation, H3K36 di- and tri-methylation level in colorectal cancer tissue  
were analyzed immunohistochemistry.

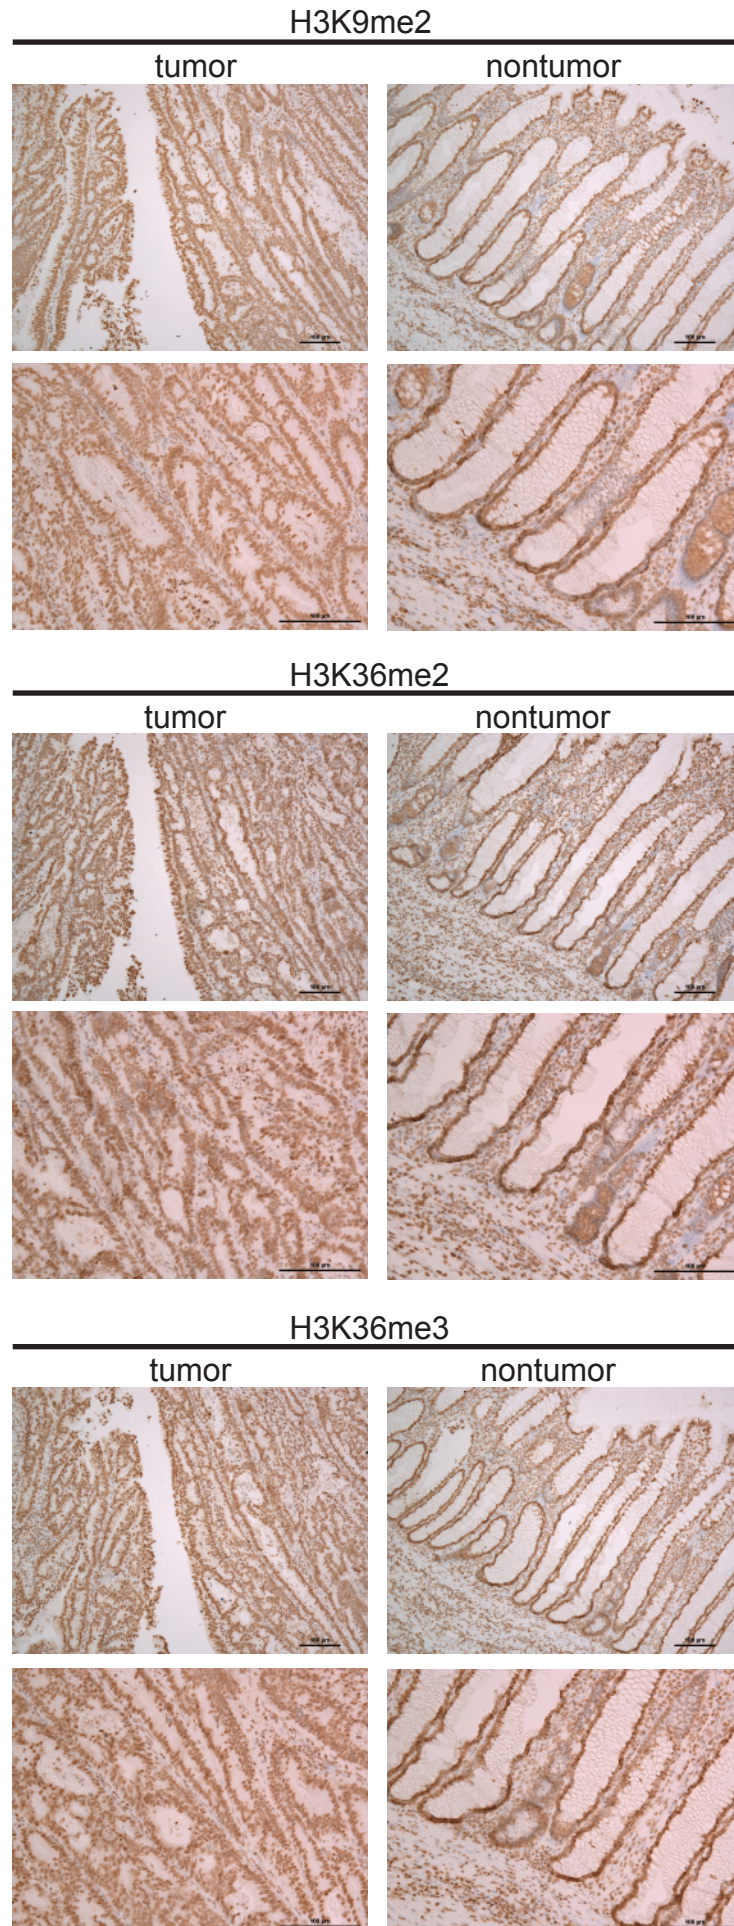

Colon cancer tissue were stained with anti-H3K9me3, anti-H3K36me2, and anti-H3K36me3 mAbs. Tumor (left) and nontumor (right) regions were shown with low (upper panels) and high (lower panels) magnification. Bar, 100 $\mu$ m
